# Supplementary material
Source: MDPI journal article supplement (https://www.mdpi.com/1424-2818/13/11/567)
Supplement: s1 [file s1]

# Supplementary Materials

**Table S1.** – List of species grouped by successional stage and their abundance by treatment and year. \* Denotes significant difference at  $\alpha = 0.05$  for the Indicator Species Analysis.

| SPECIES   |                                                         | CONTROL |      |      |      |      |      |      | REMOVAL |      |      |      |      |      |
|-----------|---------------------------------------------------------|---------|------|------|------|------|------|------|---------|------|------|------|------|------|
|           |                                                         | 2007    | 2010 | 2012 | 2014 | 2016 | 2018 | 2020 | 2010    | 2012 | 2014 | 2016 | 2018 | 2020 |
| PIONEER   | <i>Aegiphila riedeliana</i> Schauer                     | 0       | 9    | 0    | 0    | 0    | 0    | 0    | 198*    | 12*  | 5    | 1    | 1    | 0    |
|           | Asteraceae                                              | 1       | 5    | 6    | 2    | 0    | 0    | 0    | 0       | 0    | 0    | 0    | 0    | 0    |
|           | <i>Baccharis microdonta</i> DC.                         | 0       | 3    | 3    | 3    | 1    | 1    | 0    | 0       | 0    | 0    | 0    | 0    | 0    |
|           | <i>Baccharis oblongifolia</i> (Ruiz & Pav.) Pers.       | 0       | 1    | 1    | 0    | 0    | 0    | 0    | 0       | 0    | 0    | 0    | 0    | 0    |
|           | <i>Clethra scabra</i> Pers.                             | 0       | 0    | 0    | 0    | 0    | 0    | 0    | 0       | 3    | 9    | 11   | 13   | 21   |
|           | Indet.                                                  | 0       | 0    | 0    | 0    | 0    | 0    | 0    | 23*     | 3    | 1    | 1    | 0    | 0    |
|           | <i>Jacaranda puberula</i> Cham.                         | 0       | 0    | 0    | 0    | 0    | 0    | 0    | 1       | 2    | 2    | 2    | 2    | 2    |
|           | <i>Manihot grahamii</i> Hook.                           | 4       | 11   | 12   | 7    | 2    | 0    | 0    | 14      | 13   | 10   | 10   | 5    | 6    |
|           | <i>Mimosa scabrella</i> Benth.                          | 1       | 50   | 61   | 49   | 41   | 36   | 26   | 93      | 72   | 48   | 38   | 30   | 21   |
|           | <i>Myrsine coriacea</i> (Sw.) R. Br. ex Roem. & Schult. | 0       | 2    | 3    | 3    | 2    | 1    | 1    | 0       | 0    | 5    | 8    | 12   | 10   |
|           | <i>Myrsine umbellata</i> Mart.                          | 0       | 0    | 0    | 0    | 0    | 0    | 0    | 1       | 6    | 5    | 5    | 5    | 3    |
|           | <i>Piptocarpha angustifolia</i> Dusén ex Malme          | 32      | 139  | 154  | 102  | 57   | 36   | 25   | 248     | 208  | 131  | 88   | 53   | 27   |
|           | <i>Sapium glandulosum</i> (L.) Morong                   | 1       | 1    | 1    | 1    | 1    | 1    | 1    | 4       | 5    | 6    | 5    | 6    | 4    |
|           | <i>Solanum erianthum</i> D. Don                         | 3       | 19   | 0    | 5    | 3    | 2    | 0    | 0       | 1    | 0    | 0    | 0    | 0    |
|           | <i>Solanum pseudoquina</i> A. St.-Hil.                  | 0       | 0    | 0    | 0    | 0    | 0    | 0    | 0       | 0    | 1    | 2    | 2    | 2    |
|           | <i>Solanum sanctaecatharinae</i> Dunal                  | 0       | 0    | 0    | 0    | 0    | 0    | 0    | 48*     | 43*  | 26*  | 27*  | 25*  | 22*  |
|           | <i>Vernonanthura discolor</i> (Spreng.) H. Rob          | 0       | 13   | 18   | 15   | 14   | 10   | 9    | 1       | 1    | 6    | 6    | 6    | 5    |
| SECONDARY | <i>Annona rugulosa</i> (Schltdl.) H. Rainer             | 1       | 1    | 2    | 2    | 2    | 2    | 2    | 0       | 2    | 5    | 7    | 11   | 14   |
|           | <i>Campomanesia xanthocarpa</i> (Mart.) O. Berg         | 0       | 0    | 0    | 0    | 0    | 0    | 0    | 1       | 1    | 1    | 2    | 2    | 4    |
|           | <i>Casearia decandra</i> Jacq.                          | 0       | 0    | 0    | 0    | 0    | 0    | 0    | 4       | 4    | 5    | 4    | 3    | 4    |
|           | <i>Casearia obliqua</i> Spreng.                         | 0       | 0    | 0    | 0    | 0    | 0    | 0    | 0       | 0    | 0    | 0    | 0    | 1    |
|           | <i>Cupania vernalis</i> Cambess.                        | 1       | 1    | 1    | 1    | 1    | 1    | 1    | 0       | 0    | 1    | 2    | 4    | 4    |
|           | <i>Ilex paraguariensis</i> A St.-Hil.                   | 0       | 1    | 2    | 2    | 2    | 2    | 3    | 0       | 0    | 1    | 2    | 9    | 25*  |
|           | <i>Inga lentiscifolia</i> Benth.                        | 0       | 0    | 0    | 0    | 0    | 0    | 0    | 0       | 0    | 1    | 1    | 1    | 1    |
|           | <i>Lamanonia ternata</i> Vell.                          | 0       | 0    | 0    | 0    | 0    | 0    | 0    | 1       | 1    | 1    | 1    | 2    | 2    |
|           | <i>Lonchocarpus campestris</i> Mart. ex Benth.          | 0       | 0    | 0    | 0    | 0    | 0    | 0    | 0       | 0    | 0    | 0    | 0    | 1    |
|           | <i>Matayba elaeagnoides</i> Radlk.                      | 0       | 0    | 1    | 1    | 1    | 1    | 1    | 2       | 2    | 2    | 3    | 4    | 4    |
|           | <i>Ocotea puberula</i> (Rich.) Nees                     | 1       | 7    | 9    | 5    | 4    | 2    | 1    | 8       | 8    | 4    | 3    | 2    | 2    |
|           | <i>Prunus brasiliensis</i> Dietrich                     | 0       | 0    | 0    | 0    | 0    | 0    | 1    | 2       | 2    | 2    | 2    | 2    | 2    |
|           | <i>Symplocos uniflora</i> (Pohl) Benth.                 | 0       | 0    | 0    | 0    | 0    | 0    | 1    | 0       | 0    | 0    | 0    | 0    | 3    |
|           | <i>Symplocos tenuifolia</i> Brand                       | 0       | 0    | 0    | 0    | 0    | 0    | 0    | 2       | 2    | 2    | 2    | 3    | 3    |
|           | <i>Zanthoxylum rhoifolium</i> Lam.                      | 0       | 1    | 1    | 1    | 1    | 1    | 0    | 1       | 0    | 0    | 0    | 0    | 0    |

|      |                                                |   |   |    |   |   |   |   |   |   |   |   |   |   |
|------|------------------------------------------------|---|---|----|---|---|---|---|---|---|---|---|---|---|
|      | <i>Strychnos brasiliensis</i> (Spreng.) Mart.  | 0 | 0 | 0  | 0 | 0 | 0 | 0 | 0 | 0 | 0 | 0 | 1 | 2 |
| LATE | <i>Nectandra megapotamica</i> (Spreng.) Mez    | 0 | 0 | 0  | 0 | 0 | 0 | 0 | 0 | 0 | 0 | 0 | 4 | 8 |
|      | <i>Ocotea porosa</i> (Nees & C. Mart.) Barroso | 0 | 0 | 0  | 0 | 0 | 0 | 0 | 0 | 1 | 1 | 1 | 3 | 7 |
|      | <i>Sloanea guianensis</i> (Aubl.) Benth.       | 0 | 0 | 19 | 0 | 0 | 0 | 0 | 0 | 1 | 0 | 1 | 1 | 1 |

**Table S2.** – Results for statistical significance (*p*-values) using mixed model statistics for comparisons between control and removal during the 2010–2020 period and between years for control and removal separately for stand basal area (*G*, m<sup>2</sup>.ha<sup>-1</sup>), density (*N*, no. trees.ha<sup>-1</sup>), mean diameter ( $\overline{DBH}$ , cm) and mean height ( $\overline{H}$ , m). Annual values and standard deviations (SD) are also included for each parameter. \* Denotes significant difference at  $\alpha = 0.05$  after Bonferroni correction.

| STAND BASAL AREA      |                   |            |             |             |             |             |             |             |                |               |             |              |              |              |
|-----------------------|-------------------|------------|-------------|-------------|-------------|-------------|-------------|-------------|----------------|---------------|-------------|--------------|--------------|--------------|
| year                  | Control x Removal | CONTROL    |             |             |             |             |             |             | REMOVAL        |               |             |              |              |              |
|                       |                   | 2007       | 2010        | 2012        | 2014        | 2016        | 2018        | 2020        | 2010           | 2012          | 2014        | 2016         | 2018         | 2020         |
| 2010                  | <0.001*           |            | -           | 0.006*      | <0.001*     | <0.001*     | <0.001*     | <0.001*     | -              | 1.0           | 1.0         | 1.0          | 1.0          | 1.0          |
| 2012                  | 1.0               |            |             | -           | 1.0         | 1.0         | 1.0         | 1.0         |                | -             | 1.0         | 1.0          | 1.0          | 1.0          |
| 2014                  | 1.0               |            |             |             | -           | 1.0         | 1.0         | 1.0         |                |               | -           | 1.0          | 1.0          | 1.0          |
| 2016                  | 1.0               |            |             |             |             | -           | 1.0         | 1.0         |                |               |             | -            | 1.0          | 1.0          |
| 2018                  | 1.0               |            |             |             |             |             | -           | 1.0         |                |               |             |              | -            | 1.0          |
| 2020                  | 1.0               |            |             |             |             |             |             | -           |                |               |             |              |              | -            |
| Stand basal area (SD) |                   | 4.32 (4.9) | 9.91 (7.6)  | 16.45 (7.7) | 17.69 (6.7) | 19.01 (6.8) | 18.83 (4.7) | 18.05 (6.2) | 20.98* (4.5)   | 18.99 (4.5)   | 19.26 (4.5) | 20.39 (5.4)  | 22.06 (4.5)  | 20.81 (4.4)  |
| DENSITY               |                   |            |             |             |             |             |             |             |                |               |             |              |              |              |
| year                  | Control x Removal | CONTROL    |             |             |             |             |             |             | REMOVAL        |               |             |              |              |              |
|                       |                   | 2007       | 2010        | 2012        | 2014        | 2016        | 2018        | 2020        | 2010           | 2012          | 2014        | 2016         | 2018         | 2020         |
| 2010                  | <0.001*           |            | -           | 1.0         | 1.0         | 0.022*      | <0.001*     | <0.001*     | -              | 0.168         | <0.001*     | <0.001*      | <0.001*      | <0.001*      |
| 2012                  | 0.623             |            |             | -           | 1.0         | 0.002*      | <0.001*     | <0.001*     |                | -             | 1.0         | 0.248        | 0.036*       | 0.046*       |
| 2014                  | 0.278             |            |             |             | -           | 0.892       | 0.006*      | <0.001*     |                |               | -           | 1.0          | 1.0          | 1.0          |
| 2016                  | 0.015*            |            |             |             |             | -           | 1.0         | 0.040*      |                |               |             | -            | 1.0          | 1.0          |
| 2018                  | <0.001*           |            |             |             |             |             | -           | 1.0         |                |               |             |              | -            | 1.0          |
| 2020                  | <0.001*           |            |             |             |             |             |             | -           |                |               |             |              |              | -            |
| Density (SD)          |                   | 400 (365)  | 1,956 (833) | 2,178 (792) | 1,474 (429) | 978 (235)   | 711 (141)   | 533 (141)   | 4,844* (1,434) | 2,904 (1,012) | 2,096 (433) | 1,756* (506) | 1,600* (592) | 1,593* (526) |
| DBH (MEAN)            |                   |            |             |             |             |             |             |             |                |               |             |              |              |              |
| year                  | Control x Removal | CONTROL    |             |             |             |             |             |             | REMOVAL        |               |             |              |              |              |
|                       |                   | 2007       | 2010        | 2012        | 2014        | 2016        | 2018        | 2020        | 2010           | 2012          | 2014        | 2016         | 2018         | 2020         |
| 2010                  | 1.0               |            | -           | 0.001*      | <0.001*     | <0.001*     | <0.001*     | <0.001*     | -              | 0.115         | <0.001*     | <0.001*      | <0.001*      | <0.001*      |
| 2012                  | 0.453             |            |             | -           | 0.002*      | <0.001*     | <0.001*     | <0.001*     |                | -             | 0.492       | 0.002*       | <0.001*      | <0.001*      |
| 2014                  | 0.005*            |            |             |             | -           | 0.003*      | <0.001*     | <0.001*     |                |               | -           | 1.0          | 0.056        | 1.0          |
| 2016                  | <0.001*           |            |             |             |             | -           | 0.130       | <0.001*     |                |               |             | -            | 1.0          | 1.0          |
| 2018                  | <0.001*           |            |             |             |             |             | -           | 1.0         |                |               |             |              | -            | 1.0          |
| 2020                  | <0.001*           |            |             |             |             |             |             | -           |                |               |             |              |              | -            |
| DBH (SD)              |                   | 6.6 (9.8)  | 6.6 (4.5)   | 8.3 (5.3)   | 10.7 (6.2)  | 13.8 (7.6)  | 16.6 (7.9)  | 18.6 (9.2)  | 6.1 (4.3)      | 7.4 (5.4)     | 8.7* (6.4)  | 9.7* (7.3)   | 10.4* (8.3)  | 9.7* (8.5)   |
| HEIGHT (MEAN)         |                   |            |             |             |             |             |             |             |                |               |             |              |              |              |
| year                  | Control x Removal | CONTROL    |             |             |             |             |             |             | REMOVAL        |               |             |              |              |              |
|                       |                   | 2007       | 2010        | 2012        | 2014        | 2016        | 2018        | 2020        | 2010           | 2012          | 2014        | 2016         | 2018         | 2020         |
| 2010                  | 1.0               |            | -           | <0.001*     | <0.001*     | <0.001*     | <0.001*     | <0.001*     | -              | 0.001         | <0.001*     | <0.001*      | <0.001*      | <0.001*      |
| 2012                  | <0.001*           |            |             | -           | 0.084       | <0.001*     | <0.001*     | <0.001*     |                | -             | 0.873       | 0.007        | 0.001        | 0.781        |
| 2014                  | <0.001*           |            |             |             | -           | 1.0         | 0.002*      | <0.001*     |                |               | -           | 1.0          | 1.0          | 1.0          |
| 2016                  | <0.001*           |            |             |             |             | -           | 1.0         | 0.483       |                |               |             | -            | 1.0          | 1.0          |
| 2018                  | <0.001*           |            |             |             |             |             | -           | 1.0         |                |               |             |              | -            | 1.0          |

|             |              |              |              |               |               |               |               |              |               |               |               |               |               |
|-------------|--------------|--------------|--------------|---------------|---------------|---------------|---------------|--------------|---------------|---------------|---------------|---------------|---------------|
| 2020        | <0.001*      |              |              |               |               |               | -             |              |               |               |               |               | -             |
| Height (SD) | 4.1<br>(9.8) | 5.6<br>(1.7) | 9.4<br>(3.1) | 11.6<br>(3.5) | 13.4<br>(3.7) | 15.3<br>(3.8) | 15.9<br>(5.0) | 5.4<br>(2.5) | 7.4*<br>(3.5) | 8.3*<br>(3.9) | 9.1*<br>(4.3) | 9.3*<br>(5.0) | 8.1*<br>(5.4) |

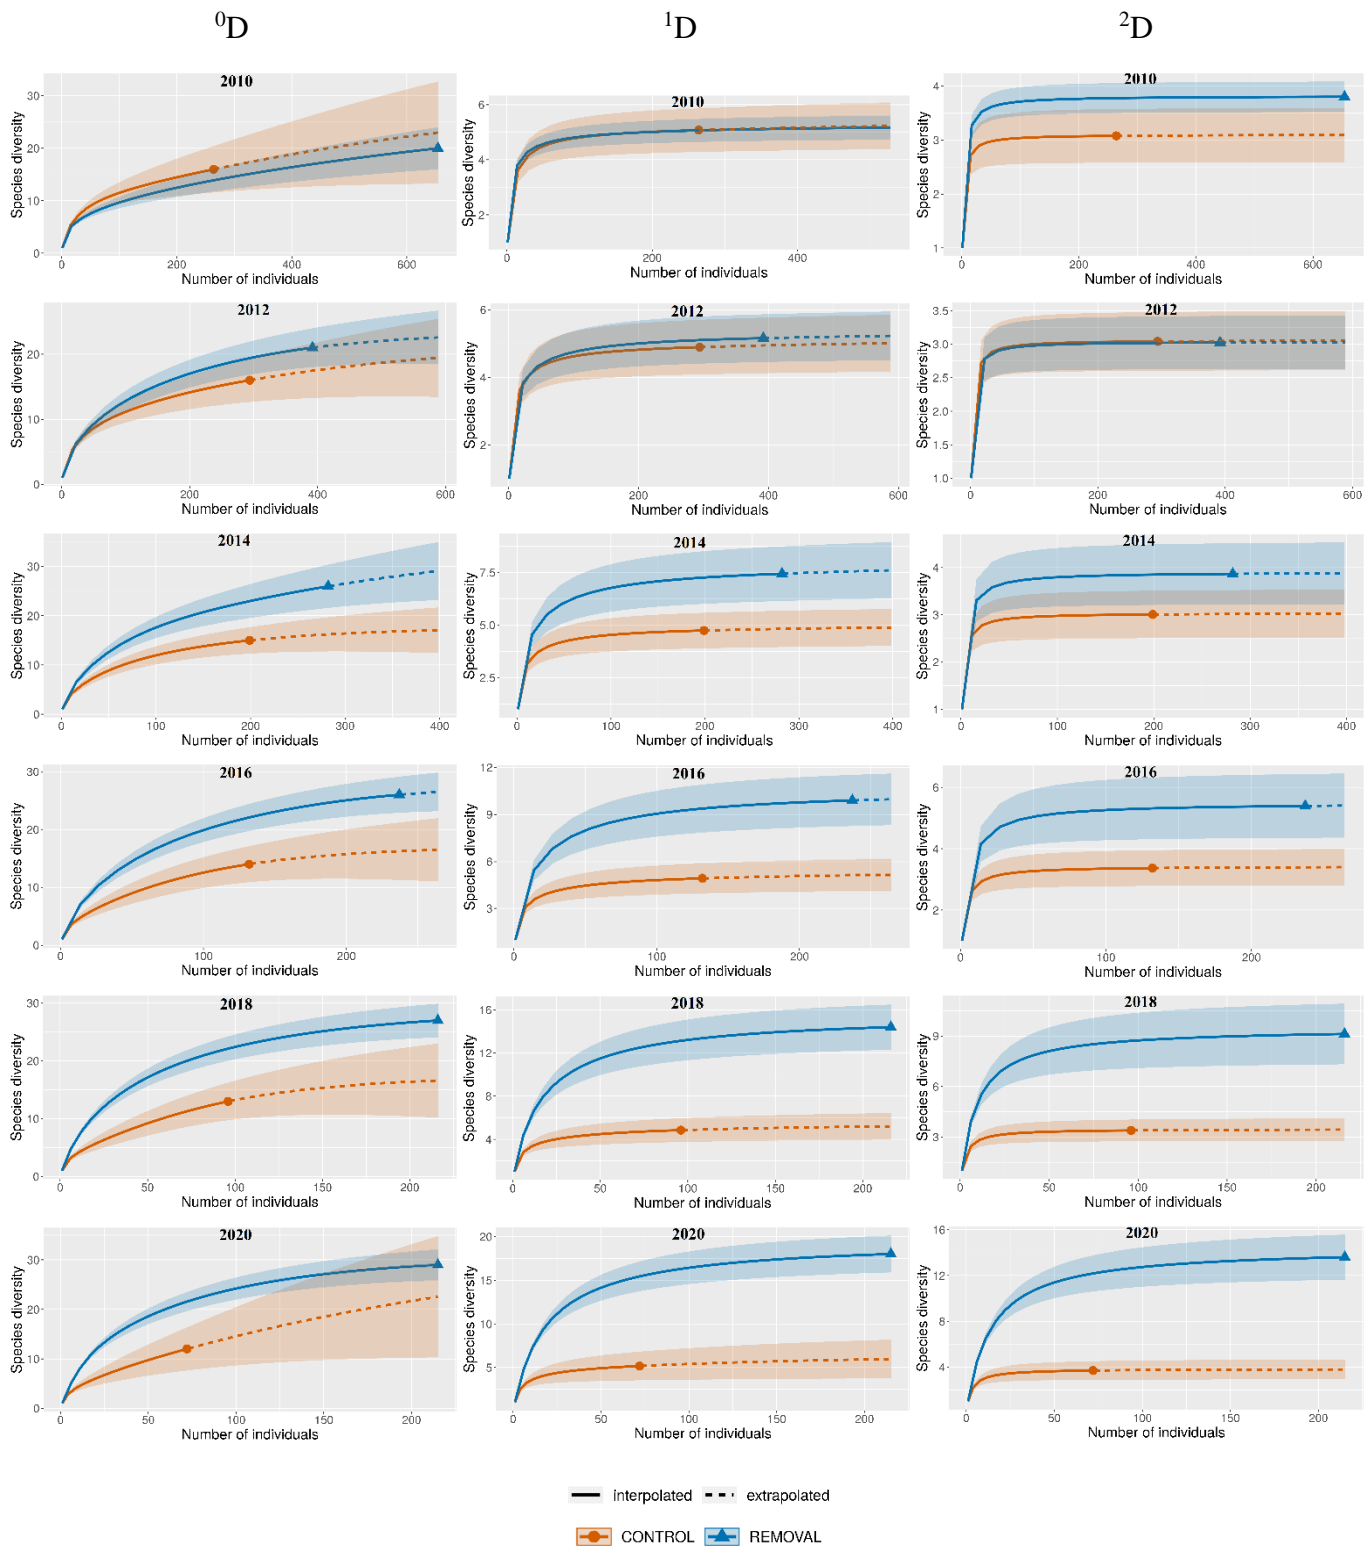

**Figure S1.** – Interpolated and extrapolated curves of the effective number of species based on Hill numbers:  $^0D$  is the species richness;  $^1D$  is the algebraic logarithmic transformation of Shannon-Wiener Index; and  $^2D$  is the inverse of the Simpson concentration.
